# Supplementary material
Source: MDPI journal article supplement (https://www.mdpi.com/2076-3417/13/5/3111)
Supplement: s1 [file s1]

**Table S1.** Primers linked with barcodes used to perform PCR amplification of target regions.

| Sample ID | BarcodeSequence |
|-----------|-----------------|
| A2        | CGATGT,ATTCCT   |
| A1        | ATCACG,ATTCCT   |
| B1        | AGTCAA,ATTCCT   |
| B2        | TGACCA,ATTCCT   |

**Linker Primer Sequence**

CCTAYGGGRBGCASCAG,GGACTACNNGGGTATCTAAT  
CCTAYGGGRBGCASCAG,GGACTACNNGGGTATCTAAT  
CCTAYGGGRBGCASCAG,GGACTACNNGGGTATCTAAT  
CCTAYGGGRBGCASCAG,GGACTACNNGGGTATCTAAT
