# Supplementary material
Source: MDPI journal article supplement (https://www.mdpi.com/2076-3417/13/5/3111)
Supplement: s1 [file s1]

Archive with 4 entries (4 files):
- Figure S3. Result of taxonomic annotation by KRONA..pdf
- Figure S2. GraPhlAn of Taxonomic tree.pdf
- Figure S1.pdf
- Table S1.pdf
