# Supplementary material
Source: MDPI journal article supplement (https://www.mdpi.com/2076-3417/13/5/3111)
Supplement: s1 [file s1]

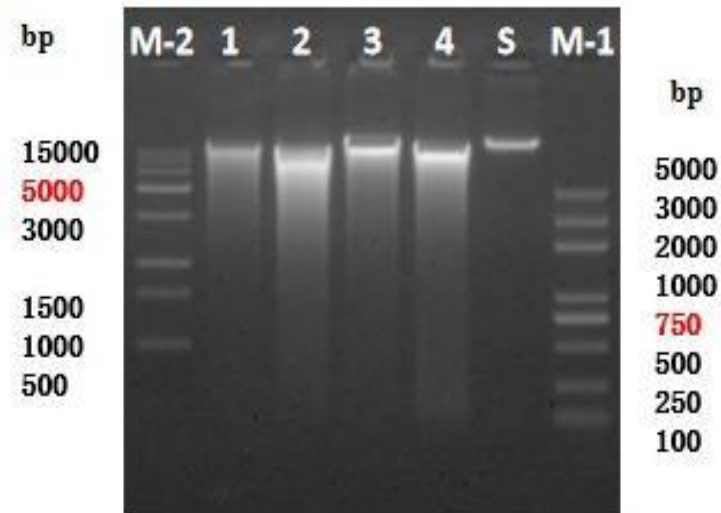

A)

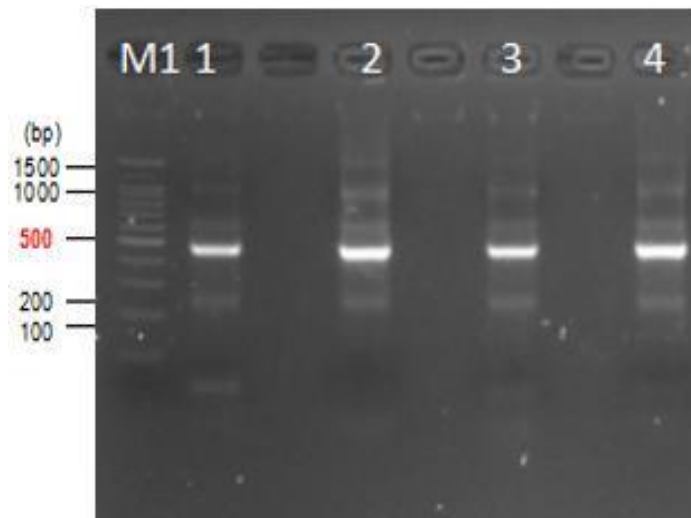

B)

**Figure S1.** Electrophoresis image of the pair-end row reads. A) Results of the DNA gel electrophoresis image B) Results of the PCR products gel electrophoresis image. Note: S, standard sample (50ng); M1-Molecular marker 15k plus(loaded 2 $\mu$ L); samples ranged in the order of upper table (All loaded 2 $\mu$ L).
