# Supplementary material
Source: MDPI journal article supplement (https://www.mdpi.com/2076-3417/13/5/3111)
Supplement: s1 [file s1 › Figure S3. Result of taxonomic annotation by KRONA..pdf]

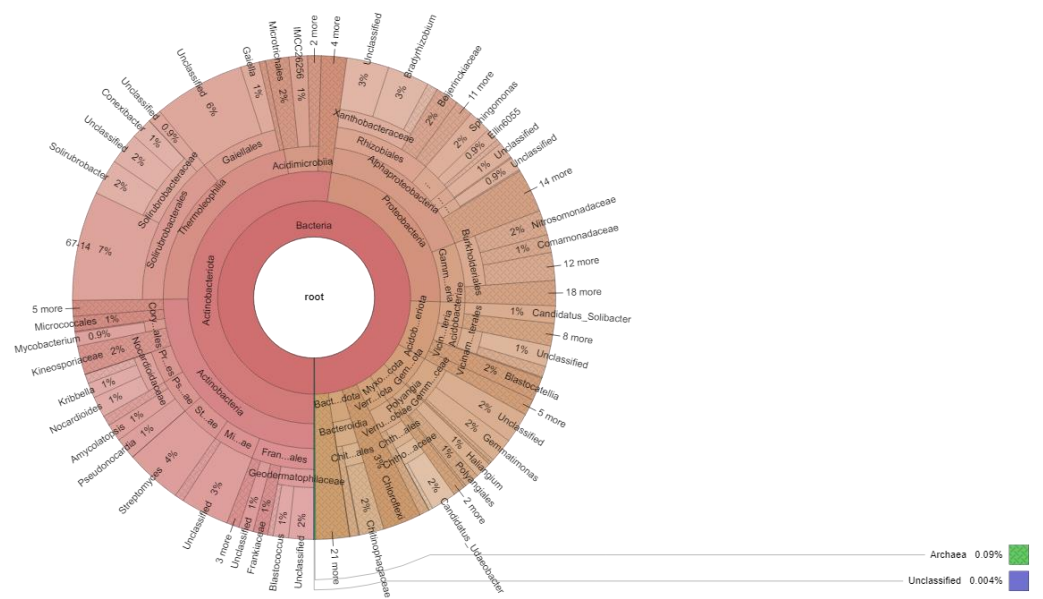

A) A1 Harmali thermophilic stage

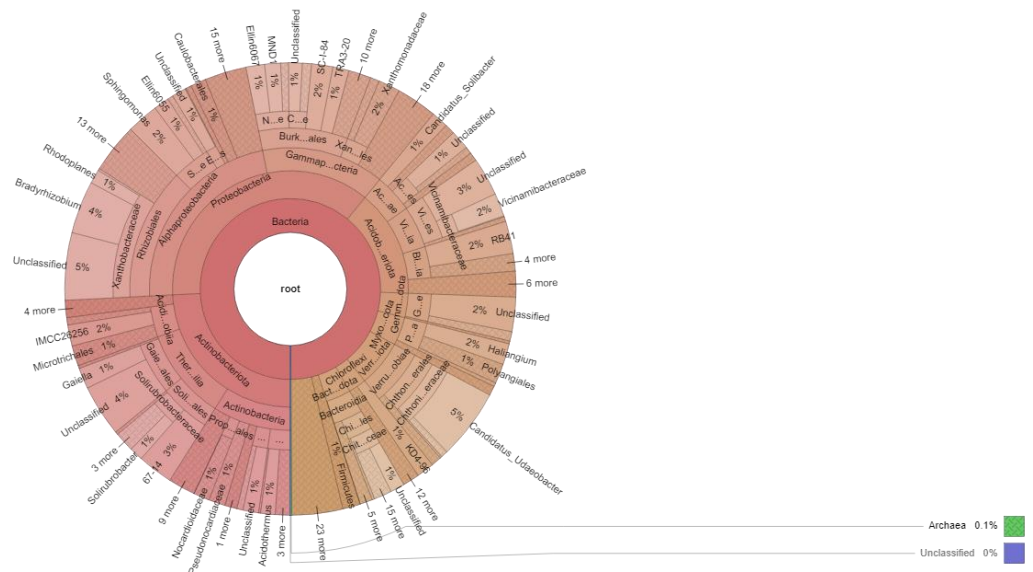

B) A2 Harmali mesophilic stage

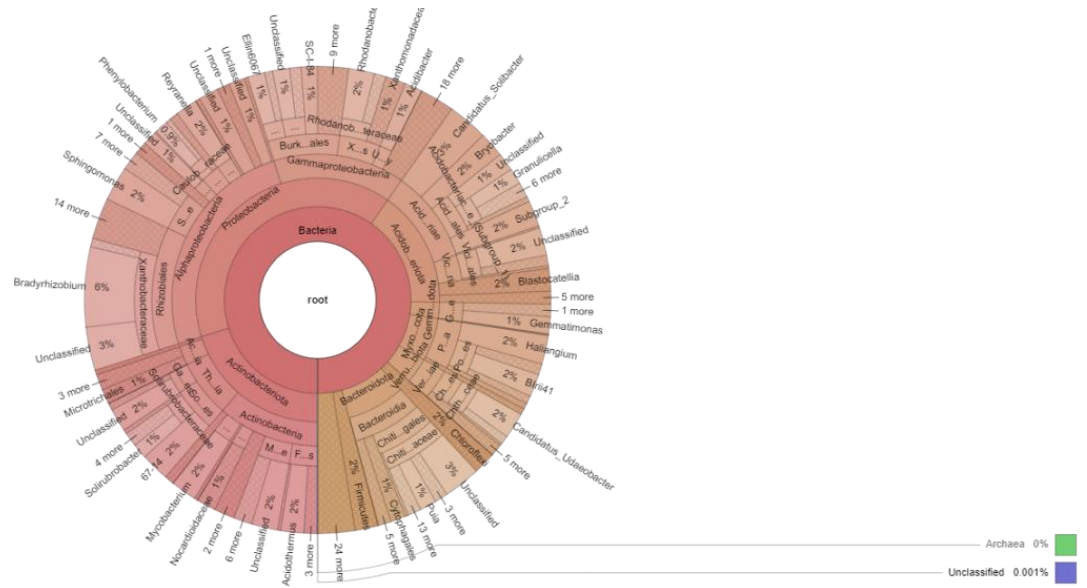

C) B1 Yasno pole mesophilic stage

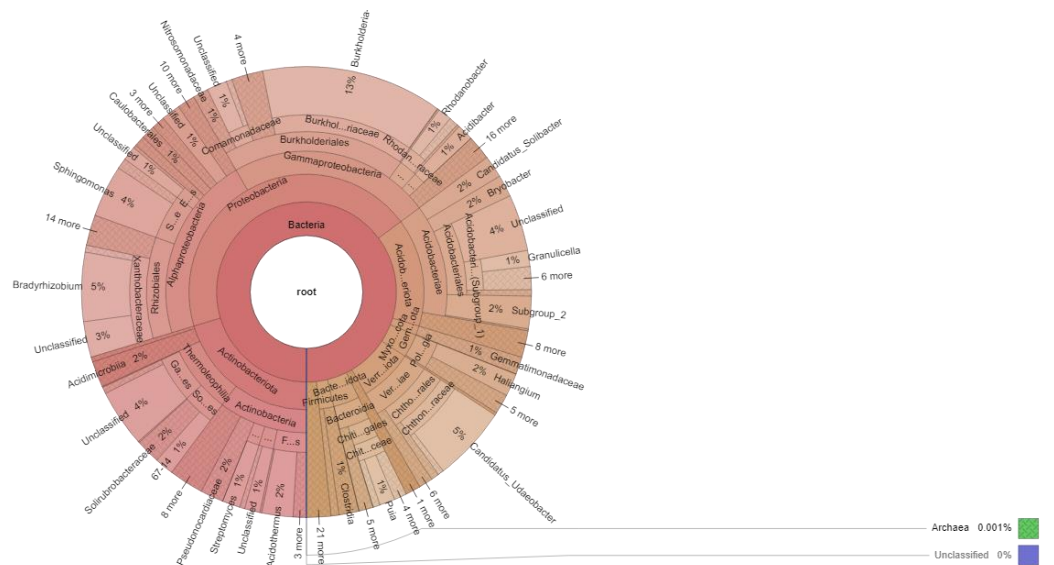

D) B2 Yasno pole thermophilic stage

**Figure S3.** Result of taxonomic annotation by KRONA. Circles from inside to outside stand for different taxonomic ranks, and the area of sector means respective proportion of different OTU annotation results.
